# Supplementary material for: Suppression on allergic airway inflammation of dehulled adlay (Coix lachryma-jobiL. var.ma-yuenStapf) in mice and anti-degranulation phytosterols from adlay bran
Source: Royal Society of Chemistry journal article supplement (doi:10.1039/d1fo01621k), 2021-01-01

Supplementary  
Spectra of isolated phytosterols

MS and <sup>1</sup>H NMR spectra of 3-*O*-Feruloyl-5β-sitostan-3-ol (3)

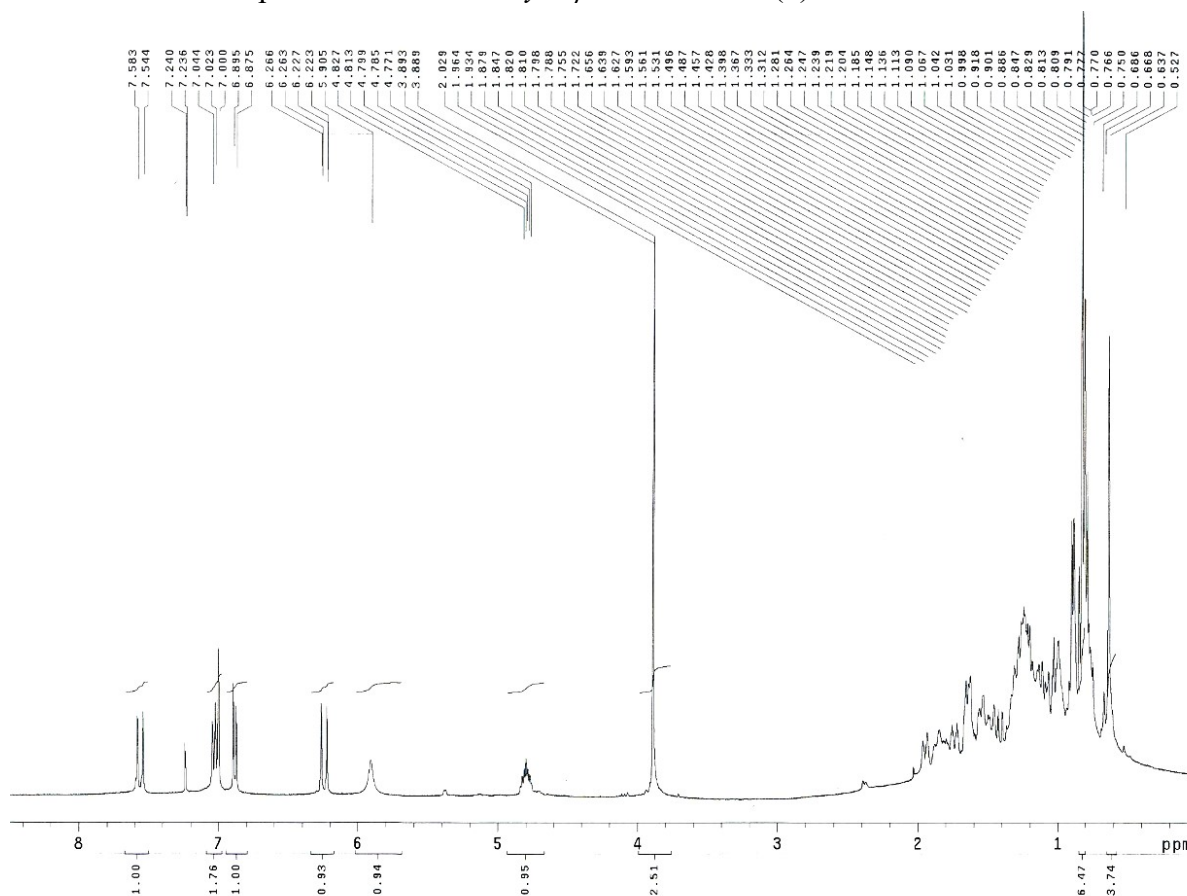

D:\Xcalibur\data\FAB\035

02/19/03 11:15:06 AM

H-F1-1

035 #120-122 RT: 5.26-5.34 AV: 3 NL: 2.07E7  
T: + c EI Full ms [ 49.50-800.50]

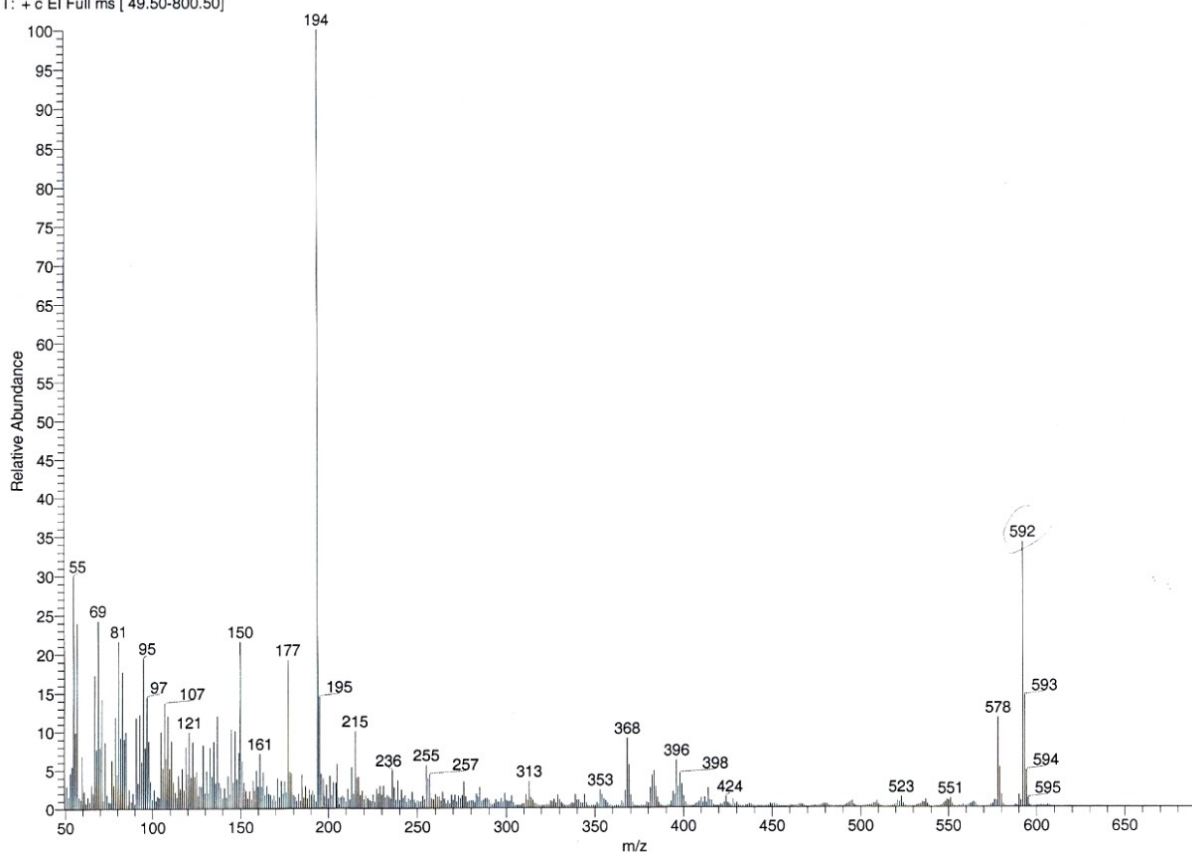

MS and <sup>1</sup>H NMR spectra of 3-O-Caffeoyl-5β-sitostan-3-ol (4)

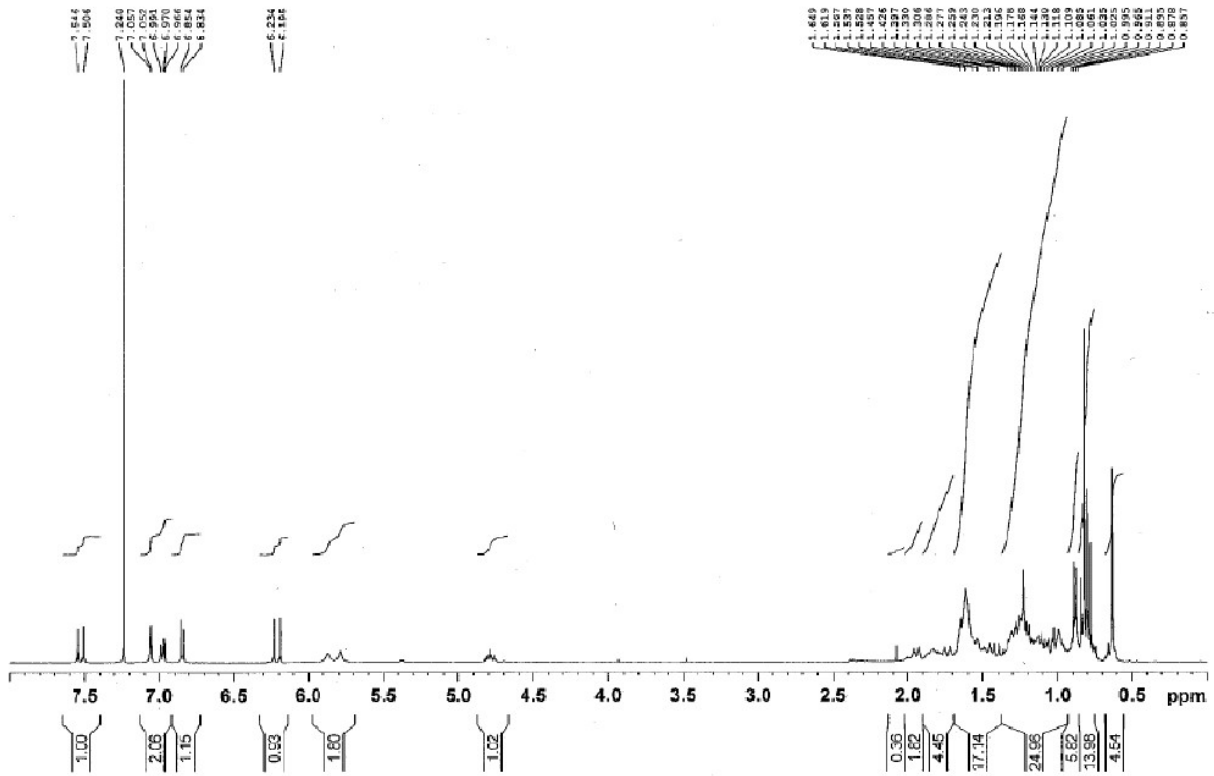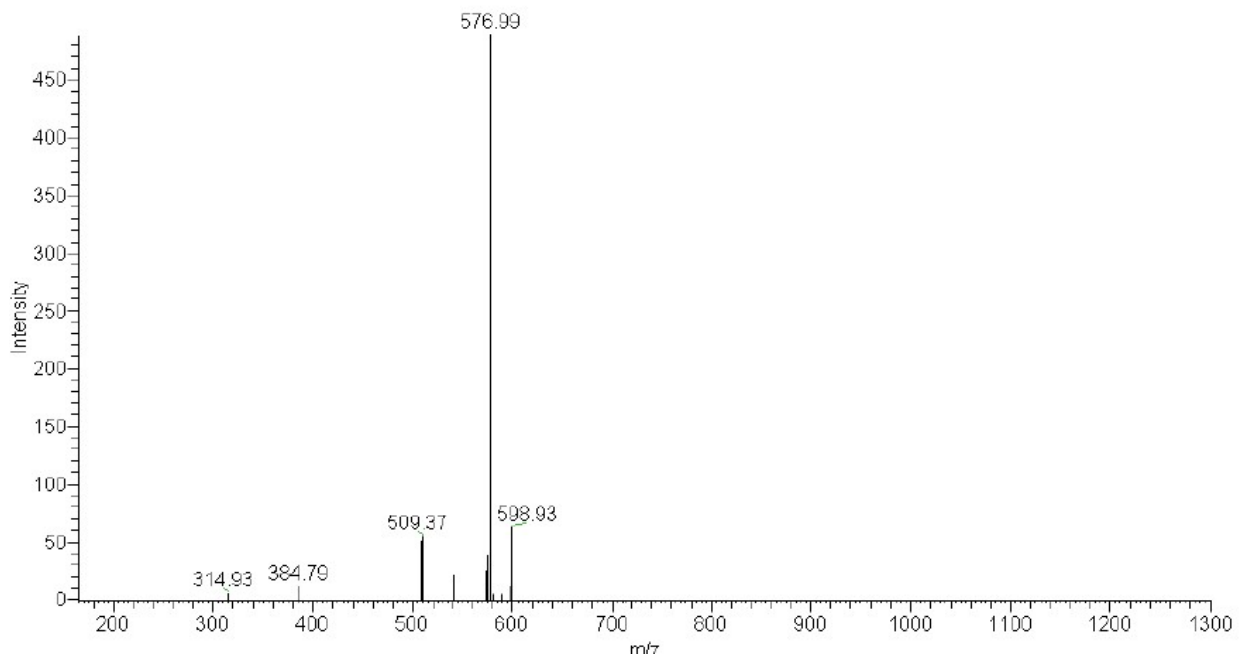

<sup>1</sup>H NMR spectrum of 6 $\alpha$ -Hydroxystigmast-4-en-3-one (5)

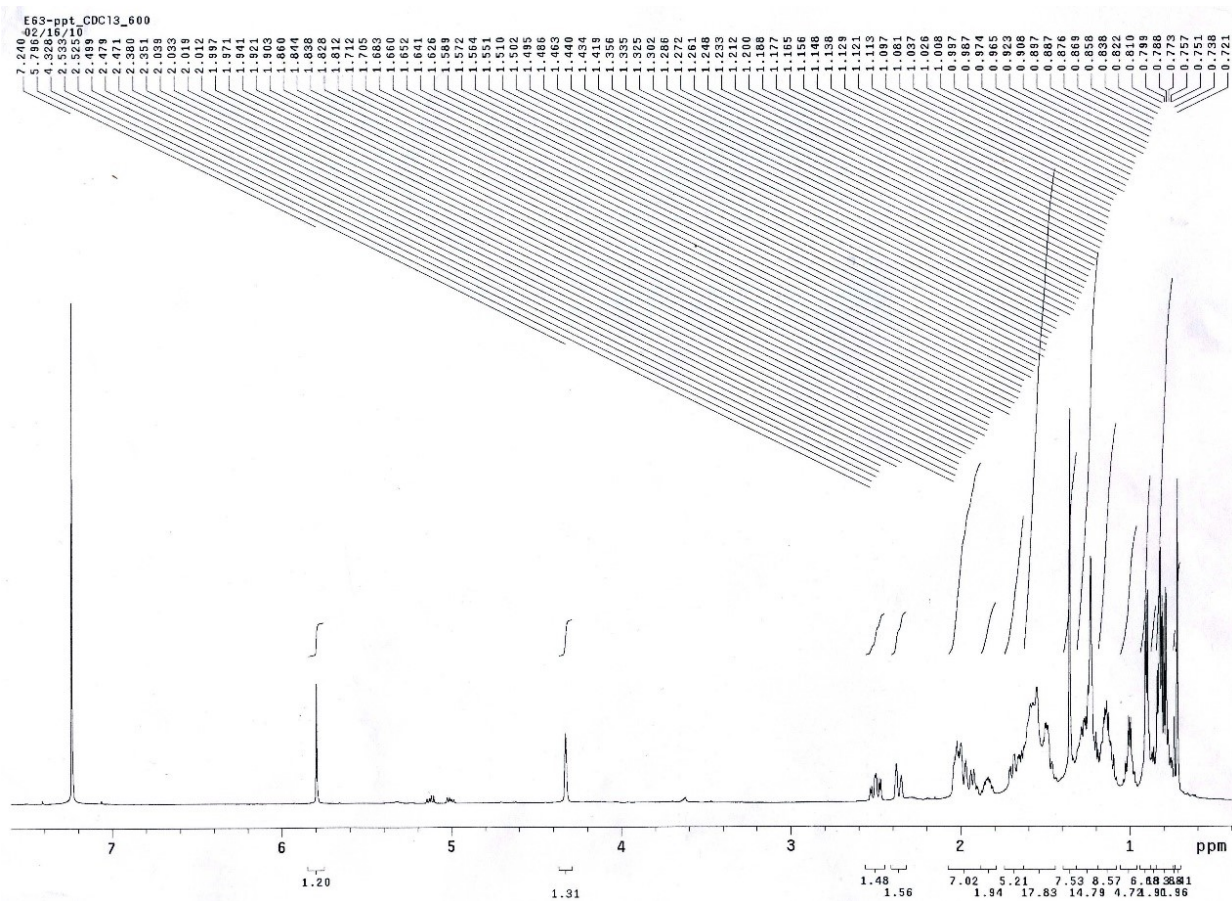

MS and <sup>1</sup>H NMR spectra of β-Sitosterol 3-O-glucopyranoside (6)

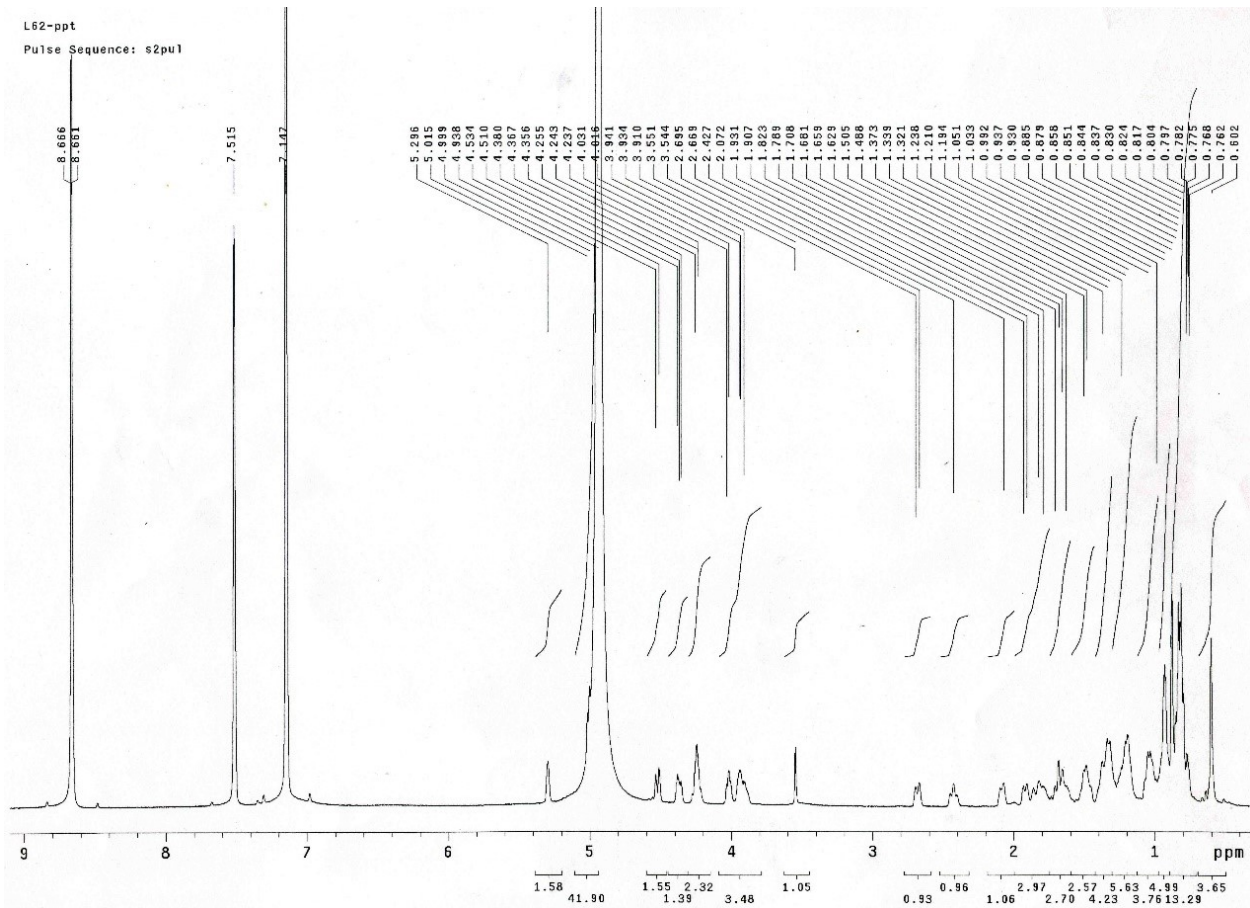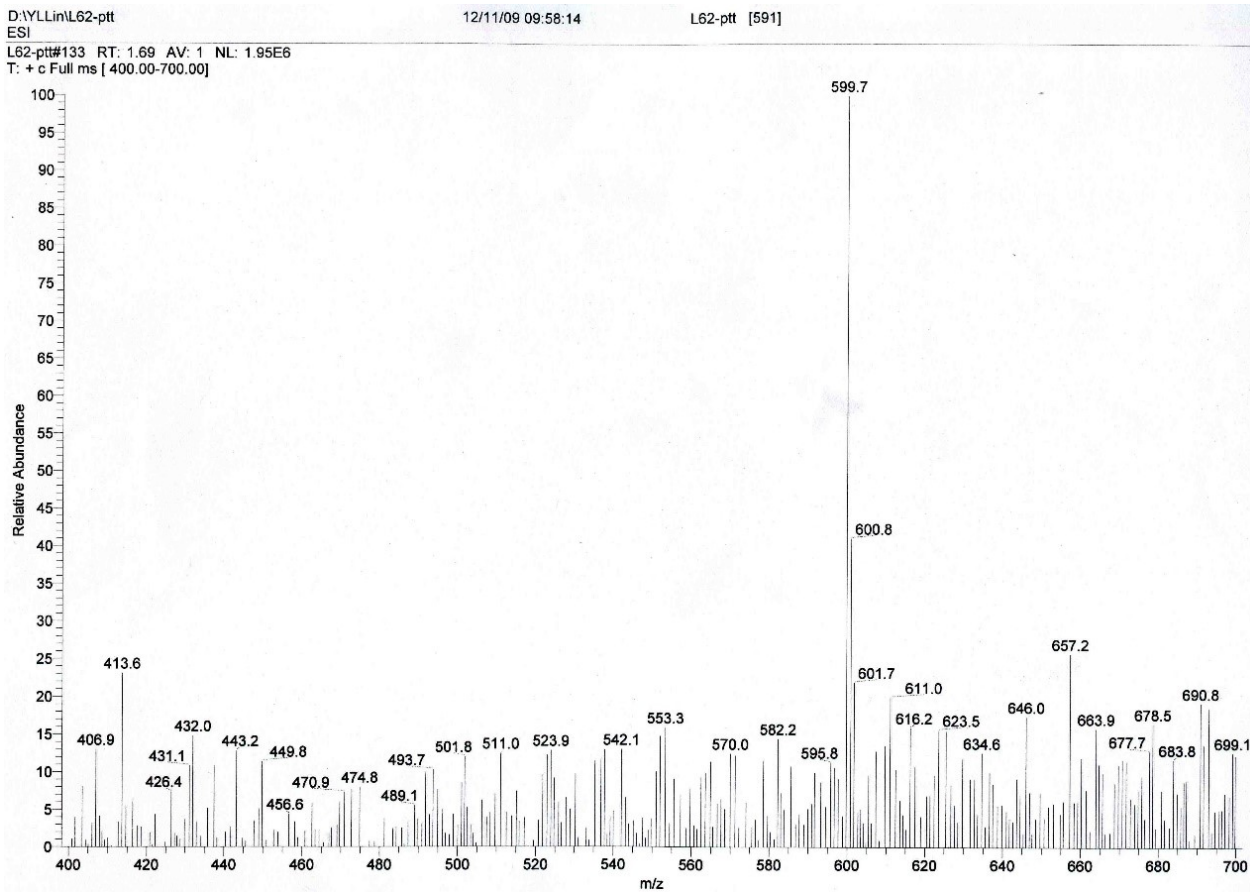

Supplement: d1fo01621k1.pdf [file d1fo01621k1.pdf]
